# Supplementary material
Source: PubMed Central journal article supplement (PMC3559228)
Supplement: Supp_Fig2.pdf [file Supp_Fig2.pdf]

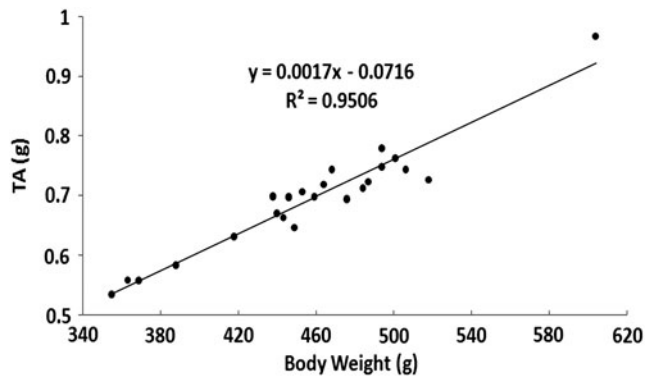

**SUPPLEMENTARY FIG. S2.** To determine the requisite weight of tissue to excise, TA weight was estimated based on the relationship between body weight and TA muscle weight. The values were obtained from historical data from our lab for rats of the same sex, strain, and age.
